# Supplementary material for: Non-targeted metabolomic profiling of Cremastra appendiculata providing insights for phytochemical analyses
Source: PeerJ. 2026 Jan 8;14:e20592. doi: 10.7717/peerj.20592 (PMC12790786; doi:10.7717/peerj.20592)
Supplement: Supplemental Information 3 [file peerj-14-20592-s003.xlsx]

## Sheet: Compounds
Name	L1	L2	L3	L4	L5	L6	AVERAGE	STDEV.S	P1	P2	P3	P4	P5	P6	AVERAGE	STDEV.S	R1	R2	R3	R4	R5	R6	AVERAGE	STDEV.S
(−)-(S)-Malate	1.91387e+06	1.84953e+06	1.74018e+06	1.3878e+06	1.35252e+06	3.84135e+06	2.01421e+06	925304	3.04378e+06	4.28828e+06	4.62315e+06	9.21652e+07	1.11243e+06	2.33843e+06	1.79285e+07	3.63911e+07	1.08469e+07	9.92774e+06	2.52809e+06	3.27301e+06	2.6566e+06	4.30011e+06	5.58875e+06	3.78058e+06
(+)-hyacinthacine B1	5.04754e+06	4.99899e+07	5.37324e+06	1.18749e+06	704136	1.61106e+06	1.06522e+07	1.93753e+07	1.57507e+07	1.68875e+07	387317	2.31437e+06	553475	591577	6.08083e+06	7.96966e+06	1.37852e+07	9.99139e+06	2.43529e+06	7.60968e+06	4.74211e+06	2.08839e+07	9.90794e+06	6.68312e+06
(+)-Retronecine	1.20185e+06	4.15753e+06	1.61693e+06	642909	323620	512136	1.40916e+06	1.42898e+06	1.79869e+06	1.3349e+06	1.35378e+06	771128	691230	762773	1.11875e+06	446007	1.01811e+07	1.14466e+08	2.0313e+08	1.34877e+07	6.27738e+06	1.04008e+08	7.52583e+07	7.94026e+07
(±)9-HpODE	1.60651e+07	9.81972e+07	9.0186e+06	1.373e+07	8.36611e+06	2.04973e+07	2.76457e+07	3.4857e+07	2.81611e+08	1.40566e+08	1.85501e+08	2.11372e+08	2.37821e+08	1.43816e+08	2.00114e+08	5.49897e+07	8.47661e+07	2.34648e+08	3.89559e+08	3.85589e+08	2.26795e+08	1.03805e+08	2.37527e+08	1.31436e+08
(±)-Malic acid	2.52992e+08	1.06808e+08	1.17322e+08	7.17271e+07	9.2512e+07	1.24138e+08	1.27583e+08	6.42276e+07	1.51487e+08	1.794e+08	1.76755e+08	8.01164e+07	5.87248e+07	5.77549e+07	1.17373e+08	5.81711e+07	1.12005e+08	9.76381e+07	1.65738e+08	1.98389e+08	1.76184e+08	1.52847e+08	1.50467e+08	3.86443e+07
(2R)-2,3-Dihydroxypropanoic acid	8.2016e+07	9.51067e+07	4.26825e+06	2.59136e+06	3.80723e+06	9.27419e+06	3.2844e+07	4.34166e+07	6.43747e+06	1.96261e+06	7.07789e+06	2.04735e+06	9.80825e+06	3.83911e+06	5.19545e+06	3.11659e+06	4.6446e+06	3.91336e+06	3.85285e+06	4.26403e+06	1.6472e+07	3.84342e+06	6.16504e+06	5.05894e+06
(7E,9E,11E)-7,9,11-Tridecatrienoic acid	7.9053e+06	3.24793e+06	3.11968e+06	3.76235e+06	1.74824e+06	4.00238e+06	3.96431e+06	2.0838e+06	1.7599e+07	3.02609e+07	2.35469e+07	8.82741e+06	2.0397e+07	3.27894e+07	2.22368e+07	8.74259e+06	2.43188e+06	6.02443e+06	2.38179e+06	2.44723e+06	2.29736e+06	1.91355e+06	2.91604e+06	1.53554e+06
(9cis)-Retinal	2.01672e+06	1.68513e+06	2.1319e+06	1.84131e+06	1.60177e+06	1.76987e+06	1.84112e+06	201039	5.69793e+06	1.72188e+06	1.92853e+06	2.0615e+06	1.94151e+06	1.768e+06	2.51989e+06	1.56182e+06	1.74523e+06	1.70294e+06	1.96953e+06	1.66809e+06	1.7144e+06	1.66232e+06	1.74375e+06	114769
(E)-Ferulic acid	9.01793e+06	1.68131e+06	3.61804e+06	2.20561e+06	8.90578e+06	2.16047e+06	4.59819e+06	3.44166e+06	8.77847e+07	1.08429e+08	6.82328e+07	5.81788e+07	3.59775e+07	4.27027e+07	6.68843e+07	2.74968e+07	1.57565e+09	1.41763e+09	2.48828e+09	2.13978e+09	2.04175e+09	1.95228e+09	1.93589e+09	3.88983e+08
(E)-Isoferulic acid	1.99846e+06	1.5567e+06	1.95835e+06	1.3883e+06	4.57062e+06	1.9984e+06	2.24514e+06	1.1679e+06	2.39854e+07	1.19405e+07	3.53857e+07	7.28543e+07	2.07902e+07	1.68355e+07	3.02986e+07	2.22953e+07	1.07986e+06	2.06734e+06	5.2335e+06	6.44707e+06	6.97749e+06	2.54635e+06	4.0586e+06	2.47911e+06
(E)-parinaric acid	5.13283e+07	1.5976e+07	949336	1.40562e+07	586220	556014	1.39087e+07	1.9638e+07	548739	509842	534894	2.03792e+07	3.03357e+06	2.14683e+06	4.52551e+06	7.83695e+06	536644	485625	483792	553361	535473	1.22444e+06	636556	289431
(E)-p-coumaric acid	323082	318567	430269	684915	354049	324500	405897	142999	364488	619850	3.13828e+06	444930	2.08308e+06	808491	1.24319e+06	1.12104e+06	2.00361e+07	5.97792e+07	5.29427e+07	7.94664e+07	2.2979e+07	4.20385e+07	4.6207e+07	2.27051e+07
(R)-3-Hydroxy myristic acid	1.42498e+06	5.83009e+06	1.12048e+06	1.05086e+06	2.67923e+06	6.10289e+06	3.03475e+06	2.34714e+06	7.49831e+06	2.25908e+06	2.39849e+06	1.21964e+06	2.70927e+06	1.34813e+06	2.90549e+06	2.32701e+06	7.40622e+06	808755	5.46429e+06	7.06095e+06	1.10342e+06	4.49378e+06	4.38957e+06	2.86438e+06
(Z)-Aconitic Acid	1.16877e+07	329403	1.17596e+07	9.87493e+06	321224	311280	5.71402e+06	5.94665e+06	2.24909e+07	4.30926e+06	305613	4.78825e+06	430489	312708	5.43954e+06	8.60445e+06	1.04183e+06	906736	2.56417e+07	1.38561e+07	4.85099e+06	9.03104e+06	9.2214e+06	9.44755e+06
1,2-O-Ethylidene b-D-mannopyranose	3.16133e+06	1.19727e+06	2.13829e+06	220595	1.69707e+06	7.64588e+06	2.67674e+06	2.62291e+06	247283	2.75712e+06	1.05158e+06	422317	4.06351e+06	922768	1.57743e+06	1.5087e+06	2.74684e+07	2.3159e+08	8.47463e+07	1.05531e+08	1.21902e+08	1.47043e+08	1.19714e+08	6.81192e+07
1,8-Naphtholactam	3.42022e+06	3.65052e+06	2.87915e+06	4.08034e+06	4.11918e+06	2.55147e+06	3.45014e+06	635523	4.38753e+06	8.74484e+06	3.34141e+06	5.26241e+06	3.72626e+06	5.20232e+06	5.1108e+06	1.93951e+06	9.32812e+06	570352	587678	778369	8.01879e+06	3.62689e+06	3.81837e+06	3.95642e+06
10-Hydroxydecanoic acid	827222	720109	766957	171458	700496	719757	651000	239338	762195	707331	706898	857915	701926	734498	745127	59802.6	775242	764193	736034	719320	709801	779975	747428	29831.7
10-Undecenoic acid	1.05584e+06	1.03718e+06	1.1478e+06	1.00086e+06	1.03693e+06	1.18734e+06	1.07766e+06	72966.9	1.20213e+06	1.0854e+06	1.04174e+06	1.06184e+06	1.03769e+06	955375	1.06403e+06	80658.5	1.15182e+06	1.15163e+06	1.25563e+06	1.31016e+06	1.32665e+06	1.1469e+06	1.2238e+06	84086.6
11,12-Epoxy-(5Z,8Z,11Z)-icosatrienoic acid	1.33585e+06	1.88157e+06	1.10423e+06	1.19402e+06	1.58379e+06	1.2401e+06	1.38993e+06	291435	1.10994e+07	1.18052e+06	1.13883e+06	1.14601e+06	1.44518e+06	1.22729e+06	2.87288e+06	4.03177e+06	3.58931e+06	1.73285e+06	1.13446e+06	1.18914e+06	1.21759e+06	2.5977e+06	1.91017e+06	992463
12-Hydroxydodecanoic acid	1.43361e+06	1.43565e+06	1.59587e+06	3.21686e+06	1.50522e+06	1.52942e+06	1.78611e+06	703579	1.65823e+06	1.46016e+06	1.34455e+06	1.54669e+06	1.41476e+06	2.17696e+06	1.60023e+06	302735	1.49286e+06	1.66752e+06	1.83635e+06	2.12098e+06	1.75567e+06	1.53933e+06	1.73545e+06	228540
12-Hydroxylauric acid	2.08388e+06	2.10868e+06	2.15276e+06	2.07282e+06	2.09029e+06	2.49231e+06	2.16679e+06	161920	2.24938e+06	2.00997e+06	2.0616e+06	2.13185e+06	2.08883e+06	1.9038e+06	2.07424e+06	116230	1.99917e+06	2.0813e+06	2.0126e+06	2.3967e+06	2.13481e+06	2.25423e+06	2.14647e+06	153773
16-Hydroxyhexadecanoic acid	1.73312e+07	1.64936e+07	1.03453e+08	2.23491e+06	1.50949e+07	1.15103e+07	2.76864e+07	3.75264e+07	1.06458e+07	1.30896e+07	1.10851e+07	9.64726e+07	1.28647e+07	1.59261e+07	2.66806e+07	3.42418e+07	8.88314e+06	9.66751e+06	8.96827e+06	1.09253e+06	1.53804e+07	1.10536e+07	9.17424e+06	4.64183e+06
16-Oxocafestol	3.15476e+07	3.86077e+06	2.00633e+07	3.45081e+07	1.19626e+06	1.16177e+06	1.53896e+07	1.53964e+07	1.32681e+06	1.24712e+06	1.06027e+06	1.17628e+07	1.15569e+06	2.35169e+07	6.67825e+06	9.26916e+06	1.17986e+06	1.70001e+06	1.02063e+06	1.16142e+06	1.13821e+06	1.38551e+06	1.26427e+06	243936
1-Hexanoic acid	242829	191639	189017	214796	217406	219111	212466	19897.4	240781	216436	258503	280966	217414	202688	236131	29627.6	1.37051e+06	1.266e+07	4.48264e+06	5.54988e+06	6.6596e+06	7.9091e+06	6.43862e+06	3.77407e+06
1-O-Octanoyl-β-D-glucopyranose	507626	521779	462990	450443	534436	579896	509528	47712.8	225772	537262	522523	607149	513397	499718	484303	132120	2.18655e+06	4.82759e+06	3.86329e+06	2.03738e+07	2.69467e+06	1.11034e+07	7.50822e+06	7.07687e+06
2,2'-Dihydroxychalcone	479372	767890	426906	415417	1.24138e+06	4.87776e+06	1.36812e+06	1.74799e+06	1.38751e+06	823971	2.11773e+06	434467	404089	397828	927599	698079	3.77421e+06	7.85448e+06	1.53429e+06	755389	6.8962e+06	6.00459e+06	4.46986e+06	2.9188e+06
2',4'-Dihydroxychalcone	471132	460206	439611	396749	957585	454044	529888	211121	471075	462054	1.19869e+06	459112	424975	384443	566725	311251	1.76011e+06	345592	441239	404805	417650	1.1328e+06	750367	575388
2,5-Dihydroxybenzaldehyde	1.80815e+07	2.34027e+07	5.55324e+06	2.29009e+06	1.22509e+07	4.33729e+07	1.74919e+07	1.48742e+07	1.85951e+07	2.01114e+07	1.01205e+07	2.69653e+06	9.9702e+06	1.82812e+07	1.32958e+07	6.8246e+06	1.46383e+07	3.95207e+07	1.33906e+07	9.39343e+06	4.11486e+07	6.56178e+07	3.06182e+07	2.19898e+07
2-Amino-4-methylpyrimidine	1.55139e+06	6.73592e+06	6.80271e+06	1.62692e+07	1.42183e+07	6.4507e+06	8.67138e+06	5.50199e+06	1.18289e+07	1.62066e+07	6.71129e+06	1.14113e+07	4.05877e+07	1.13647e+07	1.63518e+07	1.22481e+07	2.51758e+07	1.90856e+06	1.74026e+06	8.99084e+06	9.95667e+06	7.18053e+06	9.15877e+06	8.58746e+06
2-Furoic acid	9.86821e+07	1.6145e+07	1.12041e+08	7.89377e+07	9.11824e+06	1.04039e+07	5.42213e+07	4.76126e+07	1.60595e+06	5.64811e+06	253914	384284	1.45299e+06	1.18802e+06	1.75554e+06	1.98612e+06	4.65293e+07	4.86834e+07	1.90147e+08	1.16684e+08	5.04897e+07	8.84308e+07	9.01606e+07	5.63942e+07
2-Hydroxymyristic acid	3.993e+06	1.85272e+06	4.0068e+06	2.29522e+06	3.66294e+06	2.24641e+06	3.00951e+06	981784	2.56421e+06	6.95208e+06	5.63781e+06	3.59824e+06	2.96086e+06	3.46813e+06	4.19689e+06	1.71757e+06	1.61018e+06	1.48436e+06	2.01791e+06	7.06095e+06	2.44367e+06	1.87054e+06	2.74793e+06	2.13956e+06
2-Methoxy-4-vinylphenol	913867	699082	707385	955996	799606	1.00281e+06	846458	129803	947949	744915	1.0775e+06	9.56758e+06	853493	776076	2.32792e+06	3.54876e+06	877060	839929	1.242e+07	2.22617e+07	2.50111e+07	8.82425e+06	1.17057e+07	1.03208e+07
2-Oxobutyric acid	5.62915e+07	4.75027e+07	2.42836e+07	2.2717e+07	5.48103e+07	4.8268e+07	4.23122e+07	1.49869e+07	4.65598e+07	3.98012e+07	5.70638e+07	1.05848e+06	6.87782e+07	4.17049e+07	4.24944e+07	2.29976e+07	2.82364e+07	3.018e+07	2.71699e+07	2.98266e+07	3.00009e+07	3.92497e+07	3.07773e+07	4.31544e+06
2-Oxoglutaric acid	4.88604e+06	825099	5.16892e+06	3.16905e+06	2.75882e+06	1.58285e+06	3.06513e+06	1.73558e+06	6.58069e+06	3.28287e+06	3.26179e+06	1.68772e+06	379820	1.98104e+06	2.86232e+06	2.12046e+06	2.4165e+07	2.072e+07	1.95078e+07	1.1233e+07	7.6126e+06	1.95883e+07	1.71378e+07	6.31558e+06
3-Ethoxy-4-hydroxyphenylacetic acid	210048	199262	189209	414290	216102	314142	257176	89232	272821	248877	401830	797056	853393	229089	467177	284383	680661	830814	1.242e+07	2.22617e+07	2.50111e+07	8.82425e+06	1.16714e+07	1.03642e+07
3-Hydroxydecanoic acid	3.78928e+06	3.88271e+06	3.79938e+06	3.86647e+06	3.88756e+06	3.77689e+06	3.83371e+06	50509.1	4.30614e+06	3.78378e+06	3.88514e+06	3.79708e+06	3.79903e+06	3.84194e+06	3.90218e+06	201397	4.23899e+06	4.31605e+06	4.05741e+06	3.98321e+06	3.94507e+06	4.23059e+06	4.12855e+06	153370
3-Hydroxyglutaric Acid	2.24387e+07	1.81514e+07	1.3782e+07	4.05138e+06	1.64004e+06	1.52188e+06	1.02642e+07	9.07969e+06	2.44718e+07	1.35747e+06	2.18812e+06	396008	2.13631e+06	1.44368e+06	5.33223e+06	9.39903e+06	5.1158e+06	2.83323e+06	5.32579e+06	5.02037e+06	5.02975e+06	5.99193e+06	4.88615e+06	1.06975e+06
3-Methoxy-5,7,3',4'-tetrahydroxy-flavone	2.43235e+06	4.65357e+06	4.47114e+06	1.48889e+06	677557	2.92547e+07	7.16304e+06	1.09382e+07	640209	579850	586488	2.30413e+06	582033	591801	880751	697670	642682	657613	625594	608255	603005	668939	634348	26635.1
4-acetoxy cinnamaldehyde	252270	1.10113e+06	250663	288885	271090	656969	470169	346748	312536	775842	271978	489663	285122	822094	492873	250178	3.74188e+07	1.55475e+07	5.69412e+06	5.19922e+06	4.37976e+06	1.35142e+07	1.36256e+07	1.25636e+07
4-Hydroxybenzaldehyde	4.17535e+08	4.98697e+08	3.88668e+08	3.56283e+07	1.34234e+07	1.32174e+07	2.27861e+08	2.29868e+08	3.73794e+08	1.74006e+07	1.29663e+07	5.24931e+08	2.84518e+08	3.61421e+07	2.08292e+08	2.18032e+08	1.45676e+07	1.50919e+07	1.39603e+07	1.42876e+07	1.24605e+08	3.06164e+07	3.55215e+07	4.41184e+07
4-Methoxycinnamic acid	3.25755e+07	1.90166e+07	3.84536e+07	2.30954e+07	2.05162e+07	4.60592e+07	2.99528e+07	1.09017e+07	2.08777e+06	1.05394e+06	1.68012e+06	1.95605e+06	1.89295e+06	2.04907e+06	1.78665e+06	386716	2.43432e+07	2.78106e+07	2.7476e+07	3.18256e+07	3.19257e+07	1.82615e+07	2.69404e+07	5.13479e+06
4-oxoazetidine-2-carboxylic acid	3.85901e+07	1.36507e+07	1.70424e+07	2.54157e+07	8.29474e+07	7.90804e+07	4.27878e+07	3.08582e+07	3.08633e+07	5.33513e+07	3.1209e+07	2.23691e+07	1.11122e+08	2.77284e+07	4.61072e+07	3.35709e+07	1.5161e+08	3.40166e+07	4.97535e+07	1.37114e+08	1.09997e+08	9.02489e+07	9.54568e+07	4.68845e+07
4-Vinylphenol	689539	669793	633982	660073	763762	745206	693726	50690.2	785049	735071	734148	3.16801e+07	701028	729914	5.89421e+06	1.26325e+07	843374	802029	762115	775187	768185	854146	800839	39689
5,6,7,4'-Tetrahydroxyflavanone 6,7-diglucoside	457217	888735	583311	424398	444510	472699	545145	177312	6.97923e+07	419818	464699	534718	406832	413109	1.20052e+07	2.83098e+07	658041	613433	523035	639091	520608	639868	599013	61461.7
5,7-DIHYDROXYCOUMARIN	1.90952e+07	2.18323e+06	2.34972e+06	280456	3.58326e+06	1.84297e+07	7.65361e+06	8.67206e+06	1.20643e+07	2.28396e+06	695242	4.92726e+06	3.2917e+06	1.3646e+06	4.1045e+06	4.17468e+06	8.91074e+06	3.9748e+07	1.74207e+07	1.41546e+07	4.13591e+07	5.64136e+07	2.96678e+07	1.88422e+07
6-Oxohexanoic acid	6.90689e+06	7.63533e+06	2.12526e+07	2.45602e+06	7.58674e+06	2.23209e+06	8.0116e+06	6.94453e+06	2.34062e+06	2.97891e+06	5.92444e+06	5.43513e+06	4.12636e+06	4.82584e+06	4.27188e+06	1.40098e+06	5.64089e+07	2.25728e+07	7.96599e+07	1.28898e+07	7.09834e+06	5.36818e+07	3.87186e+07	2.87774e+07
8-Methoxyfustin	305112	302333	299978	2.78553e+07	338637	310374	4.90196e+06	1.12448e+07	366630	330368	321473	332724	336956	326859	335835	15974.9	463834	549458	370065	377360	352938	413630	421214	74191
9,10-Dihydroxystearic acid	2.68115e+07	1.11051e+07	5.39724e+06	1.17407e+07	2.41975e+07	1.73311e+06	1.34975e+07	1.00457e+07	6.61507e+06	1.94884e+06	2.00406e+06	2.06959e+07	2.84187e+07	7.90027e+06	1.12638e+07	1.08507e+07	1.89243e+07	4.47833e+06	2.50696e+06	2.4843e+06	2.1784e+06	2.9361e+07	9.98887e+06	1.14786e+07
9-Hydroxynonanoic acid	4.01662e+06	4.02902e+06	4.17248e+06	3.87615e+06	4.16702e+06	3.9384e+06	4.03328e+06	119375	4.16022e+06	3.88245e+06	3.99404e+06	4.63632e+06	3.7999e+06	3.94267e+06	4.06927e+06	302971	4.2455e+06	4.08116e+06	4.11632e+06	3.97586e+06	3.99947e+06	4.17345e+06	4.09863e+06	102655
Acevaltrate	2.26633e+06	5.14316e+06	4.12572e+06	971388	805638	706581	2.33647e+06	1.89459e+06	1.54359e+07	3.22517e+06	7.54635e+06	1.00214e+07	7.773e+06	7.67329e+06	8.61253e+06	4.00726e+06	708409	697741	693108	898842	752461	703267	742305	79606.7
Adipic acid	2.85377e+07	3.77003e+06	3.59643e+06	2.80391e+06	1.21551e+07	1.07184e+07	1.02636e+07	9.79789e+06	1.10071e+07	3.30597e+06	4.81952e+06	3.53718e+06	5.75866e+06	2.90048e+06	5.22149e+06	3.02711e+06	4.58943e+06	2.23924e+06	1.11178e+07	1.0329e+07	9.17353e+06	1.15167e+07	8.16096e+06	3.83543e+06
Allantoic acid	114327	108887	95517.1	98670.5	116149	121016	109094	10122.4	135005	107504	112651	7.33877e+06	112732	113731	1.32006e+06	2.94856e+06	123527	122650	113809	110540	114008	126294	118471	6461.73
alpha-ketoadipic acid	6.70796e+06	5.61672e+06	4.62892e+06	2.08402e+06	1.31444e+06	108881	3.41016e+06	2.61835e+06	1.05915e+06	979171	1.13905e+06	2.58559e+06	993590	505096	1.21027e+06	709511	2.89687e+06	3.92164e+06	3.50744e+06	2.15061e+06	1.33556e+06	2.83514e+06	2.77454e+06	930758
Andrographolide	2.32753e+07	6.58733e+07	1.86054e+07	7.89405e+06	1.88741e+06	1.96794e+06	1.99172e+07	2.41527e+07	3.39821e+07	2.12543e+06	1.9755e+06	3.61957e+07	2.11221e+06	1.82714e+06	1.30364e+07	1.70965e+07	9.91974e+06	2.11265e+06	3.54337e+06	3.18492e+06	3.37187e+06	4.91109e+06	4.50727e+06	2.79853e+06
Apigenin	706078	973086	712542	663490	757935	648414	743591	118929	701720	675089	704346	801494	639024	683830	700917	54622.1	676601	1.70145e+06	648478	688120	685879	1.29728e+06	949636	444812
Arachidic acid	5.73753e+06	5.3475e+06	5.37879e+06	5.4556e+06	6.27381e+06	4.61985e+06	5.46885e+06	541103	1.97677e+08	6.29872e+06	7.12459e+06	6.19712e+06	5.58044e+06	6.73443e+06	3.82687e+07	7.80956e+07	1.31363e+07	1.85297e+07	2.49765e+07	2.86628e+07	9.35396e+06	1.62131e+08	4.27984e+07	5.88983e+07
Arachidonic acid	3.73796e+06	3.75795e+06	3.3789e+06	3.25187e+06	3.89704e+06	4.05079e+06	3.67908e+06	305935	2.06938e+07	3.86114e+06	3.91564e+06	3.44471e+06	4.09055e+06	3.6364e+06	6.60703e+06	6.90474e+06	3.30184e+06	3.54023e+06	4.28353e+06	3.58758e+06	3.71876e+06	3.61258e+06	3.67408e+06	328989
Artemether	2.2974e+06	2.30585e+06	2.39981e+06	2.24425e+06	2.22032e+06	2.16571e+06	2.27222e+06	81074.7	2.30119e+06	2.26364e+06	2.35618e+06	3.21612e+06	2.15291e+06	2.3145e+06	2.43409e+06	389285	2.22512e+06	2.13318e+06	2.10504e+06	2.23897e+06	2.23168e+06	2.6594e+06	2.26556e+06	200944
Astragalin	3.53026e+06	1.96452e+06	1.57343e+06	1.04832e+06	381643	4.81712e+06	2.21922e+06	1.65514e+06	7.95719e+06	360854	355661	418093	344935	364083	1.63347e+06	3.09808e+06	415659	405133	413773	353995	402086	595648	431049	83757
Aureusidin 4,6-diglucoside	4.65414e+07	2.05867e+07	1.98676e+07	3.67014e+06	440055	439193	1.52575e+07	1.78983e+07	2.92948e+07	438564	470018	3.49778e+07	734944	424268	1.10567e+07	1.64272e+07	460735	431541	447020	456984	419225	440650	442693	15669.9
Azelaic acid	1.47849e+06	2.13616e+06	2.1709e+06	1.70831e+06	3.4423e+06	2.01388e+06	2.15834e+06	683342	2.44877e+07	999327	1.05002e+06	488442	2.88109e+06	746528	5.10885e+06	9.53145e+06	5.79735e+06	6.0802e+06	4.56823e+06	1.73386e+06	1.36435e+06	2.77565e+07	7.88342e+06	9.9383e+06
batatasin III	1.513e+06	1.49107e+06	1.53315e+06	1.50988e+06	1.53565e+06	1.6221e+06	1.53414e+06	46112.1	1.5259e+06	1.56946e+06	1.55472e+06	1.58312e+06	1.54869e+06	1.50329e+06	1.54753e+06	29069.3	1.49177e+06	1.4993e+06	1.46678e+06	1.52319e+06	1.53386e+06	1.51744e+06	1.50539e+06	24436.6
Betaine	7.78133e+07	4.32748e+07	4.89821e+07	1.76195e+07	1.16531e+07	2.06299e+07	3.66621e+07	2.50361e+07	8.4658e+07	1.19375e+07	6.08487e+06	6.33512e+07	1.36736e+07	1.09861e+07	3.17819e+07	3.34874e+07	4.90256e+07	1.56881e+07	2.19742e+07	3.23721e+07	6.06362e+07	4.27364e+07	3.70721e+07	1.69561e+07
brartemicin	277576	290856	272508	264240	290514	304729	283404	14702.3	2.60387e+07	287950	288344	588977	273548	274583	4.62536e+06	1.04911e+07	1.06663e+07	6.41331e+06	6.08421e+06	1.93965e+06	422284	7.30053e+06	5.47105e+06	3.72995e+06
Brazilin	1.06602e+06	904532	1.04259e+06	651706	524329	1.2974e+06	914430	285438	1.0363e+06	485647	493114	578908	479253	470370	590598	221880	564772	558352	977115	484210	1.08801e+06	6.18843e+06	1.64348e+06	2.24028e+06
Cafestol	4.04715e+07	3.20792e+07	2.74142e+07	1.27252e+08	8.17653e+07	7.93993e+07	6.47303e+07	3.86302e+07	2.55333e+09	9.25067e+08	1.81342e+09	3.32262e+09	1.84031e+09	1.87451e+09	2.05488e+09	8.08576e+08	1.13561e+08	1.25397e+08	1.62087e+08	1.57985e+08	7.80223e+07	8.40444e+07	1.20183e+08	3.56075e+07
Caffeoquinone	506130	485041	489063	192730	203998	337675	369106	145577	86955.2	196279	193290	580246	199794	195922	242081	171358	282275	250437	254488	238187	282220	272427	263339	18303.3
Cerotic acid	2.20714e+07	3.1917e+07	1.19769e+07	1.47411e+07	1.73491e+07	1.73746e+07	1.92384e+07	7.05367e+06	3.49371e+06	5.18556e+06	3.61382e+06	1.72155e+06	3.75119e+06	1.43021e+06	3.19934e+06	1.40155e+06	2.81421e+07	8.24478e+06	4.76762e+07	4.26136e+07	3.85631e+07	1.72808e+07	3.04201e+07	1.53775e+07
Chelidonic acid	2.22069e+07	9.15669e+06	8.87818e+06	5.18007e+06	1.01289e+07	1.16936e+07	1.12074e+07	5.80255e+06	1.26194e+07	8.71735e+06	8.71804e+06	1.71843e+07	3.51652e+07	8.28598e+06	1.5115e+07	1.0402e+07	5.04957e+07	3.44191e+07	3.87047e+07	6.59316e+07	4.9489e+07	5.17782e+07	4.84697e+07	1.10795e+07
Cholesterol sulfate	2.92121e+07	2.37599e+07	2.25946e+07	3.56161e+07	2.12437e+07	1.3693e+07	2.43532e+07	7.446e+06	1.86619e+07	1.46554e+07	1.54224e+07	5.40677e+07	2.6459e+07	1.24738e+08	4.23341e+07	4.2967e+07	1.43151e+07	2.0319e+07	1.15891e+07	1.72404e+07	1.88196e+07	7.95444e+06	1.50396e+07	4.68262e+06
Chrysin	3.25381e+08	3.19592e+08	3.44707e+08	3.25309e+08	5.35899e+07	1.29145e+08	2.49621e+08	1.25178e+08	3.20788e+06	1.51002e+07	3.11971e+06	3.25353e+06	3.11663e+06	2.93994e+06	5.12298e+06	4.88898e+06	3.16803e+06	1.90392e+07	9.85137e+07	3.35576e+06	1.33301e+08	5.35538e+08	1.32153e+08	2.04877e+08
cis-7-Hexadecenoic acid	3.66828e+08	1.3753e+08	2.63969e+08	5.87207e+08	3.69951e+08	1.242e+08	3.08281e+08	1.73226e+08	8.28911e+06	1.22273e+07	3.04788e+07	2.45388e+07	2.47348e+07	1.70677e+08	4.51576e+07	6.20587e+07	1.11728e+08	1.29844e+08	9.71699e+07	3.62023e+07	1.38312e+08	1.77934e+08	1.15199e+08	4.74594e+07
Citric acid	3.44038e+08	6.49082e+07	8.02489e+08	3.08751e+08	3.57754e+07	4.20164e+07	2.6633e+08	2.96428e+08	6.16321e+08	2.24214e+08	1.09531e+08	1.48029e+08	2.60972e+08	1.45497e+08	2.50761e+08	1.87629e+08	1.90213e+08	2.01941e+08	7.49472e+08	4.56443e+08	1.93654e+08	3.44073e+08	3.55966e+08	2.20285e+08
Confusoside	484972	461666	488461	316135	356052	470270	429592	74157.2	625769	431054	423501	332949	411194	425559	441671	97307.7	1.02753e+07	1.78472e+06	2.15301e+07	9.1296e+07	7.90769e+06	2.85917e+07	2.68976e+07	3.30043e+07
Cyanidin	2.14439e+07	2.15913e+07	2.18132e+07	1.15706e+07	691986	709391	1.29701e+07	1.027e+07	2.36897e+07	7.20933e+07	6.98224e+07	5.13242e+07	6.63723e+07	6.55238e+07	5.81376e+07	1.8367e+07	646333	678129	705538	683785	762982	639015	685964	45068.6
Cyclopentadecanolide	2.94569e+08	1.19034e+08	1.25755e+08	1.39936e+08	1.41013e+08	1.32188e+08	1.58749e+08	6.70624e+07	1.20684e+07	1.27071e+07	9.10201e+06	2.6713e+06	8.69859e+06	3.11483e+06	8.06038e+06	4.30463e+06	1.05558e+07	1.14471e+07	3.70704e+06	1.12781e+07	8.20891e+06	1.32175e+07	9.73572e+06	3.36982e+06
Cynaroside	534019	506588	521719	334502	381219	545511	470593	89502.4	2.89952e+06	456238	468013	352293	445415	491681	852193	1.00412e+06	462830	432821	441381	456148	380012	468647	440307	32416.4
Cysteinylglycine	1.41303e+06	1.06884e+06	1.26779e+06	191249	177849	179317	716346	594612	256220	209443	177035	200168	2.70332e+06	171941	619688	1.02121e+06	1.08003e+06	6.02201e+06	7.19758e+06	6.81075e+06	3.12337e+06	4.04833e+06	4.71368e+06	2.38556e+06
Cytosporic acid	9.28767e+06	4.31699e+06	3.43493e+06	1.95512e+06	361854	50370.5	3.23449e+06	3.40236e+06	448639	2.10484e+06	47864.8	2.39415e+06	50990.6	49772.7	849376	1.0993e+06	2.11167e+06	1.26887e+06	55965.3	51754.3	50762.7	55979.5	599167	886194
Daidzein	942446	927286	929356	910413	5.1547e+06	1.66559e+07	4.25336e+06	6.30691e+06	1.04533e+06	957671	897072	897634	915961	882431	932682	61015.5	974119	988438	5.92209e+06	963069	1.21848e+07	3.33464e+07	9.06316e+06	1.26928e+07
DL-Malic acid	2.62165e+09	1.23345e+09	1.23876e+09	1.13823e+09	9.24726e+08	1.22796e+09	1.39746e+09	6.11576e+08	1.99393e+09	1.69332e+09	1.96702e+09	8.70433e+08	5.51402e+08	4.93584e+08	1.26162e+09	7.02502e+08	1.43949e+09	1.06916e+09	1.77028e+09	1.99746e+09	1.73295e+09	1.87689e+09	1.6477e+09	3.39179e+08
Docosahexaenoic acid	2.87376e+06	3.86313e+06	691917	667297	2.85465e+06	2.50226e+06	2.24217e+06	1.29249e+06	931595	2.78611e+06	2.24929e+06	743949	3.69008e+06	4.59255e+06	2.49893e+06	1.51548e+06	1.2515e+06	1.06828e+06	1.41933e+06	1.59664e+06	3.01104e+06	1.37255e+06	1.61989e+06	703880
Docosatrienoic Acid	1.40311e+08	1.3467e+08	1.3716e+08	1.36143e+08	9.02806e+07	2.67556e+07	1.10887e+08	4.53039e+07	5.7836e+06	4.05607e+07	6.79376e+07	1.41166e+08	1.11546e+08	1.27694e+08	8.2448e+07	5.3262e+07	5.04903e+06	1.35312e+07	1.5064e+07	1.6614e+07	1.72835e+07	6.5822e+06	1.2354e+07	5.25077e+06
D-PANTOTHENIC ACID	1.19599e+07	1.20188e+07	7.9478e+06	5.14092e+06	3.09152e+06	3.13123e+06	7.21502e+06	4.10145e+06	1.53046e+07	5.98992e+06	2.1374e+06	1.69021e+07	1.62739e+07	5.03279e+06	1.02734e+07	6.59188e+06	2.71762e+07	1.48918e+07	2.07893e+07	3.20765e+07	1.94559e+07	2.17719e+07	2.26936e+07	6.06565e+06
D-Saccharic acid	179552	161190	148131	153584	173934	173932	165054	12655	373962	170205	168696	1.02312e+08	168817	165198	1.72265e+07	4.16834e+07	181355	183669	173938	167794	170728	187791	177546	7893.62
Eicosapentaenoic acid	2.82539e+06	2.3557e+06	3.07146e+06	2.89369e+06	2.36373e+06	2.4336e+06	2.65726e+06	310756	6.21685e+07	2.63583e+06	2.38162e+06	2.85532e+06	2.48788e+06	2.80616e+06	1.25559e+07	2.43058e+07	2.89641e+06	2.86617e+06	2.61078e+06	2.35931e+06	2.41882e+06	2.3679e+06	2.58656e+06	245913
Eriodictyol	1.40589e+06	1.63302e+06	638704	329800	356679	772336	856073	545266	663209	358478	350815	369941	1.46291e+07	357352	2.78814e+06	5.80212e+06	401491	397409	368870	346460	7.56309e+06	1.79925e+06	1.81276e+06	2.87389e+06
Erucamide	2.01884e+09	4.57929e+09	1.78947e+09	2.50109e+09	1.7148e+09	1.22989e+09	2.30556e+09	1.1885e+09	3.10906e+08	1.01725e+07	1.06856e+07	2.42559e+08	1.74786e+08	1.67997e+08	1.52851e+08	1.21908e+08	3.2695e+08	3.8699e+08	4.54328e+08	5.78158e+08	8.00012e+08	2.73745e+08	4.7003e+08	1.93247e+08
Erucic acid	708144	739273	760783	720029	848409	565051	723615	92298.6	7.28863e+06	629557	679145	718272	677374	650465	1.77391e+06	2.70182e+06	648784	648542	670751	654865	599719	7.99243e+06	1.86918e+06	2.99986e+06
Ethyl linolelaidate	1.1874e+07	6.94291e+07	9.73989e+06	2.27366e+07	1.40878e+08	4.71308e+07	5.02981e+07	4.99235e+07	6.34336e+06	2.63544e+07	2.84577e+07	5.56047e+07	9.6585e+07	2.72774e+07	4.01038e+07	3.181e+07	6.79844e+06	6.38732e+06	2.437e+07	4.75022e+07	3.03015e+07	6.36905e+06	2.02881e+07	1.68907e+07
flavanthrinin	1.7557e+06	2.40135e+07	1.69626e+06	1.71425e+06	1.74602e+06	1.06045e+07	6.9217e+06	9.09495e+06	1.48571e+07	1.75898e+06	1.7669e+06	1.74044e+06	1.76699e+06	1.64385e+06	3.92238e+06	5.3571e+06	1.67469e+06	1.73639e+06	1.64254e+07	1.676e+06	1.64552e+07	1.14685e+07	8.23937e+06	7.3946e+06
Fucose	2.45137e+06	2.30699e+06	2.28129e+06	1.82559e+06	1.56317e+06	1.09279e+06	1.9202e+06	525959	2.27139e+06	1.61639e+06	1.01244e+06	265383	1.57734e+06	2.06153e+06	1.46741e+06	732873	856424	1.39112e+06	446063	490993	461887	761829	734719	364300
Gluconic acid	2.82183e+08	2.41443e+08	2.06809e+08	7.85601e+07	3.51199e+07	6.34214e+07	1.51256e+08	1.04737e+08	3.12931e+08	3.60899e+07	4.35835e+07	2.23546e+07	5.94567e+07	1.49045e+07	8.15534e+07	1.14437e+08	2.25077e+08	1.00439e+08	1.83334e+08	1.8121e+08	1.36695e+08	2.36962e+08	1.77286e+08	5.18658e+07
Glucose 1-phosphate	1.42642e+07	1.24141e+07	8.95556e+06	1.94158e+06	4.78086e+06	3.88955e+06	7.70763e+06	4.96159e+06	1.26845e+07	6.85805e+06	5.59252e+06	1.77686e+07	6.40279e+06	2.6538e+06	8.66005e+06	5.53154e+06	1.4607e+06	303610	498774	879077	822383	352338	719481	434034
Glutaric acid	2.90992e+06	2.25925e+06	2.07268e+06	720256	1.01504e+06	1.03775e+06	1.66915e+06	869196	2.28821e+06	959679	767769	1.67679e+06	990262	1.12471e+06	1.30124e+06	573459	4.54232e+06	4.78562e+06	4.47766e+06	4.51948e+06	3.8265e+06	4.92284e+06	4.51241e+06	378344
Guaiacol	583906	531140	555095	527330	4.96482e+06	2.76142e+06	1.65395e+06	1.84774e+06	513256	2.68944e+06	1.32354e+06	531479	939750	2.54299e+06	1.42341e+06	972020	1.19941e+07	6.4778e+06	1.32348e+07	1.09142e+07	8.24963e+06	1.40603e+07	1.08218e+07	2.9387e+06
Herbarin A	1.90296e+06	1.60049e+06	1.48404e+06	1.70911e+06	933083	702556	1.38871e+06	468923	177285	1.88129e+06	462482	159333	350404	483555	585725	649328	2.10484e+07	2.5326e+07	1.54202e+07	1.78466e+07	9.39637e+06	1.83316e+07	1.78949e+07	5.36112e+06
Hesperetin	448529	383014	403014	365751	2.49327e+06	1.60334e+06	949486	896886	604642	400308	337104	404323	334722	698135	463206	151677	1.75376e+07	3.81196e+06	1.12379e+07	4.04718e+06	2.84592e+06	1.12529e+07	8.45558e+06	5.83978e+06
Indoleacetylaspartate	662828	676022	664622	655571	651562	650263	660145	9711.46	698346	648811	668536	710614	646797	655741	671474	26954.4	695150	709891	696334	663451	6.38014e+07	1.23334e+07	1.31499e+07	2.52472e+07
Isocitric acid	6.94759e+07	5.8184e+07	1.64478e+07	1.59306e+07	3.53924e+06	2.80434e+06	2.77303e+07	2.8786e+07	4.81271e+07	2.89919e+06	2.05038e+06	3.75555e+06	2.16306e+06	2.96735e+06	1.03271e+07	1.85285e+07	4.00997e+06	3.01025e+06	3.7348e+06	4.73939e+06	4.96484e+06	6.60204e+06	4.51021e+06	1.24389e+06
Isorhamnetin	1.25114e+07	1.90618e+07	1.62591e+07	3.03052e+06	2.86363e+06	2.45921e+07	1.30531e+07	8.76472e+06	1.30233e+06	269421	307939	308769	290921	2.87942e+06	893133	1.05341e+06	3.14532e+06	2.96527e+06	3.05954e+06	3.18162e+06	2.89817e+06	3.01131e+06	3.04354e+06	107685
Isorhamnetin 3- (2"-acetylglucoside)	655111	2.42499e+06	1.32033e+06	476698	489732	3.37791e+07	6.52433e+06	1.33727e+07	1.08372e+06	477870	490476	532563	523798	471420	596641	239880	525565	1.1477e+06	492222	493076	496570	523958	613183	262300
Isorhamnetin 3- (4Rha-galactosylrobinobioside)	1.48084e+07	4.23066e+06	6.05261e+06	2.85146e+06	915991	5.8003e+06	5.77656e+06	4.82123e+06	7.88366e+07	5.44528e+07	5.14745e+07	6.74446e+07	4.84548e+07	4.85689e+07	5.82054e+07	1.23153e+07	604954	543788	535301	521521	535093	549343	548333	29297.4
Isorhamnetin 3-rhamnosyl- (1->2) -galactoside-7-glucoside	919592	1.65815e+06	223421	206602	220030	222894	575115	600210	1.65701e+08	213881	209657	195646	204677	206169	2.77886e+07	6.75632e+07	264295	256858	236663	226194	229312	263511	246139	17418.8
Isorhapontigenin	1.51043e+06	1.53107e+06	1.46729e+06	1.53655e+06	1.49997e+06	1.47531e+06	1.50344e+06	28351.9	1.6001e+06	1.47806e+06	1.47687e+06	1.97295e+06	1.56411e+06	1.71231e+06	1.63407e+06	187647	1.7531e+06	1.58678e+06	1.59627e+06	1.54362e+06	1.52366e+06	4.58875e+06	2.0987e+06	1.22254e+06
Kaempferol	1.98648e+06	2.04227e+06	2.08235e+06	1.98839e+06	2.045e+06	2.09165e+06	2.03936e+06	44757.6	1.9809e+06	2.13031e+06	2.07649e+06	1.99135e+06	2.03196e+06	1.97058e+06	2.03026e+06	62709.1	2.00896e+06	2.01228e+06	2.04393e+06	1.98412e+06	2.00561e+06	1.99181e+06	2.00779e+06	20726.7
Kahweol	4.21316e+07	2.7138e+07	1.59173e+07	1.52394e+07	4.24235e+06	2.99996e+07	2.24447e+07	1.33606e+07	2.54732e+07	1.48312e+07	9.01603e+06	1.55186e+07	9.33016e+06	1.66666e+07	1.51393e+07	6.01001e+06	4.2619e+06	1.16819e+07	6.01772e+07	3.41211e+07	2.37256e+07	2.28886e+07	2.61427e+07	1.96281e+07
Lauric acid	2.37913e+07	2.57185e+07	2.42694e+07	2.44542e+07	1.18198e+07	1.60012e+07	2.10091e+07	5.69104e+06	2.4211e+06	1.51552e+06	1.9622e+06	2.64649e+06	1.71496e+06	3.45208e+06	2.28539e+06	711689	2.01006e+06	864427	817762	1.70243e+06	1.71399e+06	1.67123e+06	1.46332e+06	497511
L-Glutathione (reduced)	1.24362e+06	943761	377758	389000	392722	404527	625231	375150	7.28738e+06	3.89744e+06	4.05936e+06	3.62103e+06	9.08751e+06	3.53394e+06	5.24777e+06	2.35469e+06	580631	509545	1.34125e+06	3.53631e+06	2.60617e+06	1.71692e+06	1.71514e+06	1.18245e+06
Lignoceric Acid	3.23997e+08	3.07896e+08	1.53552e+08	1.50564e+08	3.48418e+08	4.00392e+08	2.80803e+08	1.04526e+08	5.61652e+07	3.96578e+08	4.43007e+08	1.56798e+08	2.61053e+08	3.46697e+08	2.76716e+08	1.48449e+08	6.90034e+07	8.62622e+07	1.09119e+08	4.4018e+07	2.8774e+08	4.55831e+07	1.06954e+08	9.1961e+07
Luteolin	571594	545729	553932	548550	550698	728223	583121	71671.6	2.06483e+07	556791	566038	583739	562386	572507	3.91496e+06	8.19763e+06	603140	620372	584120	582524	568731	617570	596076	20863.9
Meconin	454614	378144	384447	274946	342148	341994	362715	59517	387017	348308	341801	521282	651735	347956	433016	126866	644492	4.60512e+06	6.57456e+06	1.32788e+07	2.82429e+07	1.19167e+07	1.08771e+07	9.70541e+06
Myristic acid	7.43183e+06	1.34009e+07	2.56994e+08	6.27288e+07	1.27638e+07	3.50039e+07	6.47205e+07	9.64066e+07	1.12793e+07	1.76666e+07	3.05455e+07	3.10646e+08	5.44587e+07	4.40564e+06	7.15003e+07	1.18478e+08	1.12393e+07	1.99452e+07	1.80024e+07	3.45171e+06	1.12486e+07	1.12473e+07	1.25224e+07	5.87028e+06
Myristoleic acid	1.30204e+07	1.67047e+07	7.72623e+07	1.61688e+08	1.2269e+07	1.10469e+07	4.86652e+07	6.10308e+07	1.28157e+07	2.3706e+06	1.1638e+07	1.79371e+07	1.18465e+07	1.27169e+07	1.15541e+07	5.06193e+06	1.19518e+07	1.22942e+07	1.19516e+07	1.14112e+07	3.39476e+07	1.23605e+07	1.56528e+07	8.96891e+06
N-Acetyl-L-leucine	1.63405e+06	5.02701e+06	1.19165e+06	439607	735695	1.31993e+06	1.72466e+06	1.67278e+06	1.30784e+06	1.034e+06	578917	1.26268e+06	477441	669226	888351	360533	2.09983e+07	1.14562e+07	2.04517e+06	2.53972e+06	1.41692e+06	8.01059e+06	7.74449e+06	7.60424e+06
N-Acetyl-L-phenylalanine	3.23629e+06	2.33326e+06	2.40246e+06	445797	456965	446511	1.55355e+06	1.25023e+06	2.17601e+06	381313	385185	1.01515e+06	381829	235108	762431	744655	1.2866e+07	3.27644e+06	5.82228e+06	4.13844e+06	3.85019e+06	6.53592e+06	6.08154e+06	3.54754e+06
Naringenin 7-O-beta-D-glucoside 6"-acetate	395538	375476	361608	370831	387667	390426	380258	13048.5	856593	391656	380744	383712	399761	363727	462699	193345	1.63353e+07	5.11274e+06	8.67301e+06	5.70664e+06	4.38447e+06	1.25692e+07	8.79688e+06	4.76791e+06
N-Feruloyl-3-methoxytyramine	1.69789e+06	174288	1.67734e+06	1.73556e+06	1.71821e+06	1.77055e+06	1.46231e+06	631807	1.78841e+06	1.76554e+06	1.78774e+06	1.75173e+06	1.797e+06	1.64902e+06	1.75657e+06	55300	1.8013e+06	1.70606e+06	1.75218e+06	1.82209e+06	3.61417e+07	5.98502e+06	8.20139e+06	1.37914e+07
nicotianamine	2.79783e+07	1.43316e+07	1.74838e+07	8.64061e+06	3.02044e+06	3.28881e+06	1.24573e+07	9.56413e+06	2.04503e+07	4.73388e+06	1.61372e+06	1.85944e+07	1.02647e+07	2.89848e+06	9.75925e+06	8.13989e+06	1.24966e+07	4.28164e+06	2.18646e+07	3.14809e+07	5.98284e+06	1.66288e+07	1.54559e+07	1.02236e+07
Nicotinamide	3.97429e+07	1.00662e+07	1.60387e+07	1.65833e+07	4.26493e+06	1.2827e+07	1.65872e+07	1.22065e+07	2.10459e+07	5.39385e+06	6.31154e+06	1.03796e+07	7.57402e+06	5.85837e+06	9.42722e+06	5.96737e+06	8.77445e+06	4.79344e+06	8.15134e+06	1.64445e+07	6.30057e+06	1.01614e+07	9.10427e+06	4.06095e+06
Nicotinic acid	1.67019e+07	3.34484e+07	2.37714e+07	1.86887e+06	3.28865e+06	3.5621e+06	1.37735e+07	1.30504e+07	2.62803e+07	4.79905e+06	5.41473e+06	2.28221e+07	2.00454e+07	2.44743e+06	1.36348e+07	1.05471e+07	1.11367e+07	3.53702e+06	1.11624e+07	1.60536e+07	1.48347e+07	1.46664e+07	1.18985e+07	4.57349e+06
N-lauroylglycine	1.58098e+07	5.78816e+07	1.37644e+07	3.64181e+07	832306	2.5965e+06	2.12171e+07	2.20109e+07	3.78485e+07	2.0676e+06	2.86701e+06	1.02306e+07	1.38238e+07	4.26311e+07	1.82448e+07	1.76689e+07	4.07757e+06	3.24281e+06	2.93105e+06	2.90855e+06	2.36137e+06	1.9964e+06	2.91962e+06	722430
Octacosyl (E)-ferulate	8.01529e+06	5.02455e+06	1.02657e+06	1.03601e+06	6.19257e+06	4.33052e+06	4.27092e+06	2.80268e+06	6.9167e+06	4.5165e+06	5.47606e+06	932226	5.37328e+06	9.02198e+06	5.37279e+06	2.68934e+06	4.37741e+06	4.03138e+06	4.21548e+06	2.72399e+06	3.29341e+06	4.39058e+06	3.83871e+06	680262
Oleic acid	1.419e+08	4.0359e+08	3.25084e+08	3.37493e+08	2.74733e+08	2.35138e+08	2.86323e+08	9.10873e+07	2.21209e+08	6.52312e+06	2.45117e+08	2.42731e+08	2.53079e+08	4.58975e+08	2.37939e+08	1.43523e+08	4.91305e+07	2.26462e+08	2.34534e+08	3.11443e+07	2.38389e+08	2.14733e+08	1.65732e+08	9.77872e+07
Orientin 4'-O-glucoside-2"-O-rhamnoside	1.36032e+06	564830	224386	255100	282255	250265	489526	444842	4.61576e+07	2.59166e+07	2.6046e+07	2.44806e+07	2.78456e+07	2.71456e+07	2.95987e+07	8.19344e+06	336505	321644	340466	368633	331691	319163	336350	17846.9
Palmitic Acid	2.99968e+08	3.14851e+08	2.91742e+08	2.75959e+08	3.45633e+08	1.11886e+08	2.7334e+08	8.25485e+07	3.26638e+08	3.35761e+08	3.13337e+08	3.03602e+08	3.25782e+08	3.20359e+08	3.20913e+08	1.12635e+07	3.12889e+08	3.35515e+08	3.53423e+08	3.5052e+08	4.93322e+08	2.95341e+08	3.56835e+08	7.04948e+07
Panthenol	609925	606223	603521	480285	520372	382591	533820	91443.3	527902	496810	374650	576071	516383	569830	510274	73211.2	635279	230129	1.56547e+07	879365	282103	7.49301e+06	4.19576e+06	6.2753e+06
Pantothenic acid	1.41547e+08	1.24053e+08	1.02133e+08	2.42453e+08	5.23245e+07	7.31451e+07	1.22609e+08	6.71256e+07	3.08407e+06	8.89581e+06	3.67351e+06	284066	1.17938e+06	7.80304e+06	4.15331e+06	3.49287e+06	2.28473e+07	1.38733e+07	2.99267e+07	5.13057e+07	4.16455e+07	2.83678e+07	3.13277e+07	1.33632e+07
Pentadecanoic acid	1.10694e+09	1.16938e+09	4.32496e+07	4.58606e+07	1.09912e+08	5.8131e+07	4.22245e+08	5.55419e+08	5.51726e+06	5.92917e+07	9.91928e+07	1.85292e+08	3.02915e+08	1.14005e+09	2.9871e+08	4.25166e+08	2.92486e+07	4.07781e+07	4.6194e+07	6.71586e+07	5.10517e+07	3.41188e+07	4.47583e+07	1.35132e+07
Phenmetrazine	2.4131e+07	2.11311e+07	1.27088e+07	8.82417e+06	4.73483e+06	2.49631e+07	1.60822e+07	8.50843e+06	134812	226261	470203	1.7641e+06	815095	482353	648803	595628	799057	752080	992617	806518	1.24556e+06	921180	919501	182736
Phenylacetylene	691954	399114	416756	393408	746890	1.53404e+06	697028	438770	411562	741257	528926	641240	392312	405894	520199	144787	1.31818e+07	1.21401e+07	2.71413e+07	2.11262e+07	2.14088e+07	1.79176e+07	1.88193e+07	5.63006e+06
phenylpropiolic acid	2.80444e+08	3.34982e+08	1.54891e+08	1.49995e+07	4.89047e+06	1.34497e+06	1.31925e+08	1.4878e+08	2.48241e+08	1.47744e+07	1.34791e+06	2.06311e+08	1.90395e+08	1.819e+07	1.1321e+08	1.13217e+08	1.0856e+06	1.55046e+06	1.0721e+06	1.15108e+06	8.0532e+07	1.55335e+07	1.68208e+07	3.17336e+07
Phenylpyruvic acid	2.03096e+06	1.25627e+06	1.66075e+06	1.94417e+06	1.29141e+06	2.24449e+06	1.73801e+06	405542	2.20959e+06	3.12247e+06	2.56722e+06	1.04255e+06	2.45159e+06	2.93878e+06	2.3887e+06	737701	1.30097e+07	1.29561e+07	2.06204e+07	1.85913e+07	1.96127e+07	1.78625e+07	1.71088e+07	3.32909e+06
Pheophorbide A	7.68046e+08	1.76217e+09	7.91111e+08	6.43113e+08	7.00835e+08	8.44589e+08	9.18311e+08	4.19364e+08	8.04223e+06	7.60284e+06	7.10687e+06	3.10782e+06	7.08453e+06	7.63574e+06	6.76334e+06	1.82677e+06	7.58861e+06	7.96174e+06	6.92857e+06	7.02021e+06	7.1885e+06	9.92583e+06	7.76891e+06	1.12478e+06
Piceol	1.15577e+06	1.23263e+06	1.37104e+06	1.3095e+06	1.0353e+06	891514	1.16596e+06	178664	1.64666e+06	992853	913179	1.15208e+07	4.54664e+06	1.15261e+06	3.46213e+06	4.17955e+06	4.59587e+06	3.30731e+06	9.9951e+06	3.63512e+06	2.02197e+06	4.8591e+06	4.73574e+06	2.7681e+06
Pinocembrin	947884	695915	747892	579484	1.51722e+07	4.23858e+07	1.00882e+07	1.68428e+07	921454	2.45611e+06	437433	514753	426142	418244	862356	804047	1.64286e+06	3.07464e+06	2.57311e+07	424913	3.82416e+07	1.46692e+08	3.59678e+07	5.63794e+07
Plantamajoside	292337	426625	426713	200647	1.58272e+06	2.12604e+06	842514	806956	231817	1.3272e+06	1.07313e+06	244062	197556	422545	582717	491238	4.35456e+06	571436	278190	310339	1.02079e+06	3.41075e+06	1.65768e+06	1.7692e+06
preussin B	426264	421594	451466	429516	433405	469037	438547	18126.1	452562	448133	449219	420683	419595	418909	434850	16638.5	607831	578137	821055	2.20795e+07	699834	3.46549e+06	4.70864e+06	8.58316e+06
Propyl gallate	3.07267e+06	2.12945e+06	130227	377981	363933	585541	1.10997e+06	1.20157e+06	1.66048e+07	2.78337e+07	2.97784e+07	4.5671e+07	4.63794e+07	2.70454e+07	3.22188e+07	1.16381e+07	338468	1.01514e+06	7.74119e+06	1.34834e+07	1.80972e+07	7.32276e+06	7.99969e+06	6.9287e+06
Protocatechuic aldehyde	373393	390201	369585	771348	336427	259741	416783	179807	359806	337284	246090	380478	331171	747542	400395	176148	229305	1.185e+06	389173	160579	142603	174775	380240	404338
Quercetagetin 7-methyl ether 3-neohesperidoside	265505	229783	187601	182860	191784	197989	209253	32196.7	1.3786e+07	189903	184773	176626	190991	187289	2.4526e+06	5.55221e+06	254327	313818	301344	227386	209103	254930	260151	40786.4
Quercetin	2.41697e+06	4.82255e+06	2.58756e+06	2.03362e+06	717917	1.38026e+07	4.39687e+06	4.79505e+06	1.11333e+06	724015	705911	6.35503e+06	699184	690018	1.71458e+06	2.27924e+06	782907	739833	720963	737111	723752	767314	745313	24708
Quercetin 3- (6"'-rhamnosylgentiobioside)	2.31111e+07	6.07912e+06	6.61834e+06	189481	320000	144255	6.07706e+06	8.87083e+06	367687	190928	228038	3.82987e+06	179851	374900	861879	1.45653e+06	225396	278089	208400	207200	203620	283535	234373	36789.5
Quercetin 3- [ 6"- (3-hydroxy-3-methylglutaryl) galactoside ]	8.66695e+06	1.13707e+07	7.16675e+06	534006	560920	4.68868e+06	5.498e+06	4.40424e+06	1.57689e+07	387880	417339	573678	424027	415135	2.99782e+06	6.25686e+06	479184	564744	549826	419425	538413	438166	498293	61451.7
Quercetin 3-galactoside-7-glucoside	483005	458508	470773	452835	473394	476763	469213	11401.7	1.39123e+07	483602	478490	468565	559096	449830	2.72532e+06	5.48062e+06	621446	568733	710496	734390	639165	664252	656414	60456
Quercetin 3-glucosyl- (1->2) -galactoside	246633	234689	212089	212993	236300	257354	233343	18053.1	5.59425e+07	243558	228748	433562	227150	224120	9.54994e+06	2.27278e+07	312988	294058	245043	298745	237900	275413	277358	30367.1
Quercetin 3-rhamnosyl- (1->2) -galactoside-7-glucoside	1.68038e+06	677497	1.7052e+06	372032	271179	280871	831194	683510	1.24218e+07	9.75951e+06	9.62515e+06	8.97556e+06	1.24951e+07	1.25858e+07	1.09772e+07	1.69091e+06	385783	357674	275964	345386	266355	319783	325157	47007.6
Quercetin-3β-D-glucoside	8.51182e+06	3.34784e+06	2.7555e+06	1.25075e+06	459267	1.06898e+07	4.50249e+06	4.13918e+06	1.64209e+07	461426	455537	3.67778e+06	446745	438152	3.65009e+06	6.3882e+06	480786	481286	457023	458637	463165	456909	466301	11637.9
Resveratrol	646483	641585	668930	642850	675469	648093	653902	14516.3	724751	654518	669590	648642	656336	642329	666028	30170.8	2.17007e+06	1.21285e+07	721386	678755	1.15087e+07	7.68399e+06	5.81525e+06	5.31759e+06
Rubiadin	1.03888e+06	1.8096e+06	919507	635114	1.23817e+08	3.69242e+08	8.29103e+07	1.48614e+08	1.87352e+06	2.25932e+07	967954	5.64317e+06	5.47399e+06	7.36328e+06	7.31919e+06	7.86773e+06	2.13744e+07	3.83298e+07	2.48115e+08	1.1793e+06	3.59821e+08	1.24733e+09	3.19359e+08	4.76836e+08
Rutin	3.57022e+08	4.71835e+08	2.98717e+08	2.63312e+06	596878	1.8384e+08	2.19107e+08	1.92396e+08	5.85857e+08	412744	444092	1.63086e+07	451209	441747	1.00653e+08	2.37786e+08	509902	600946	585072	446312	572928	466254	530236	65391
Rutinose	4.71943e+06	4.16587e+06	1.45404e+06	3.93517e+06	184879	180862	2.44004e+06	2.07708e+06	541510	185004	178057	107881	136915	190971	223390	159123	197489	884941	603612	184262	1.0317e+06	908752	635126	371577
Safingol	3.36364e+08	1.65355e+08	1.90914e+08	1.83499e+08	6.93944e+07	7.74235e+07	1.70492e+08	9.69626e+07	1.88232e+06	9.89349e+06	6.70611e+06	1.70089e+06	7.46854e+06	7.86282e+06	5.91903e+06	3.36698e+06	6.49123e+07	6.08184e+07	6.91332e+07	7.48481e+07	7.77519e+07	7.49255e+07	7.03982e+07	6.60065e+06
Salidroside	2.9451e+06	2.19836e+06	1.43953e+06	184330	742464	1.12771e+06	1.43958e+06	1.00012e+06	191196	1.00866e+06	1.03476e+06	403012	351426	438570	571271	359122	1.73496e+07	5.07341e+07	2.90625e+06	3.80456e+06	1.63137e+06	1.47707e+07	1.51994e+07	1.86149e+07
semiplenamide A	4.01902e+08	3.08984e+08	4.30065e+08	6.03188e+07	5.97279e+06	6.20842e+06	2.02242e+08	2.00127e+08	1.59238e+08	5.91775e+08	6.00132e+08	3.85928e+08	6.26932e+08	5.53723e+08	4.86288e+08	1.81907e+08	5.06055e+06	5.42592e+06	6.56514e+06	5.84548e+06	5.69954e+06	5.77943e+06	5.72934e+06	500956
Sieboldin	183052	189035	179965	212665	418904	2.98474e+06	694727	1.12562e+06	218382	191936	114770	178847	203782	398561	217713	95575	1.14637e+07	1.01172e+07	5.75072e+06	1.57367e+06	339908	6.02943e+06	5.8791e+06	4.43639e+06
Sinapinic acid	206877	196322	184323	274587	212914	207247	213712	31499.5	256639	199400	216329	223776	1.43482e+08	192396	2.40951e+07	5.84874e+07	1.00159e+07	7.35237e+06	5.6471e+07	4.24669e+07	4.36157e+07	2.1207e+07	3.01881e+07	2.01539e+07
Stearic acid	1.54389e+09	1.96824e+09	1.95674e+09	1.73021e+09	2.03662e+09	1.62888e+08	1.56643e+09	7.11636e+08	2.94172e+08	1.29827e+08	1.85791e+09	1.94655e+09	1.99267e+09	2.33814e+09	1.42654e+09	9.56213e+08	2.36209e+08	4.20201e+08	4.50806e+08	5.017e+08	5.93919e+08	2.40083e+08	4.07153e+08	1.43548e+08
Succinic acid	1.27939e+06	1.22225e+06	1.16169e+06	1.13085e+06	3.67594e+06	5.94585e+06	2.40266e+06	1.9994e+06	1.66962e+06	3.91874e+06	7.40095e+06	1.03634e+07	6.3002e+06	5.0434e+06	5.78272e+06	2.99358e+06	1.83594e+07	1.36546e+07	6.39994e+06	4.54898e+06	1.55609e+06	2.80812e+06	7.88786e+06	6.66581e+06
Syringic acid	1.25684e+06	1.47281e+06	234287	217462	1.71157e+06	1.60223e+06	1.08253e+06	680638	2.5819e+06	2.06893e+06	3.23118e+06	356636	1.0014e+06	4.59496e+06	2.30584e+06	1.53164e+06	1.57821e+07	8.5806e+06	2.8568e+06	1.94022e+06	1.64578e+06	346186	5.19194e+06	5.92818e+06
Tamarixetin 7-rutinoside	1.05533e+08	7.46275e+07	7.05524e+07	1.10012e+07	1.81687e+06	1.86007e+06	4.42318e+07	4.48846e+07	7.75699e+07	3.41699e+06	1.49226e+06	1.06499e+06	1.25999e+06	1.8798e+06	1.44473e+07	3.09351e+07	473352	4.81502e+06	791670	427531	1.03129e+06	1.33898e+06	1.47964e+06	1.66964e+06
Taurine	3.46738e+06	489801	286163	275406	325539	560388	900779	1.26269e+06	976411	307699	423453	334371	607996	300922	491809	263868	5.31977e+06	280339	375976	435669	372670	1.86013e+06	1.44076e+06	1.99268e+06
Taxifolin	1.8506e+06	1.23718e+06	1.15682e+06	737032	364008	357989	950604	578884	9.55863e+06	3.73548e+06	4.06347e+06	1.25805e+07	1.09206e+07	3.53571e+06	7.39906e+06	4.08376e+06	393511	402903	435953	439503	402947	427929	417124	19661.7
Theophylline	438338	356595	388422	1.53915e+06	373943	81992.4	529740	510286	310778	407103	377550	129642	437548	330079	332117	109780	526718	450830	490447	519056	472804	484853	490785	28444.7
Trifolin	1.48922e+07	1.45004e+07	1.49396e+07	7.92085e+06	6.56556e+06	6.84104e+06	1.09433e+07	4.22721e+06	165974	695324	673514	3.78329e+06	640085	632484	1.09845e+06	1.33028e+06	623327	653991	680425	659446	735824	616269	661547	43464.3
Trigonelline	6.38596e+08	4.30167e+08	3.3897e+08	1.25122e+08	1.2339e+08	3.78836e+07	2.82355e+08	2.28788e+08	5.50889e+08	1.51545e+08	2.40589e+07	5.08627e+07	3.16802e+07	8.71746e+07	1.49368e+08	2.02162e+08	4.09793e+08	9.34794e+07	2.29269e+08	3.46601e+08	3.61054e+08	2.83819e+08	2.87336e+08	1.13936e+08
Vanillic acid	142181	139458	133310	150568	152690	153061	145211	8126.07	172656	165776	162025	201943	159189	148276	168311	18333.1	251040	578840	421753	772201	556753	2.71913e+06	883287	915940
Vanillin	1.65801e+06	1.60389e+06	1.6207e+06	1.07848e+06	7.56446e+06	9.33324e+06	3.8098e+06	3.64292e+06	1.62995e+06	4.83999e+06	3.26202e+06	4.44641e+06	2.77826e+06	6.03838e+06	3.8325e+06	1.58404e+06	2.09202e+07	1.21669e+07	2.11703e+07	1.85448e+07	1.28678e+07	2.29806e+07	1.81084e+07	4.56017e+06
α,α-Trehalose	1.37911e+07	1.35751e+07	9.63875e+06	6.40152e+06	6.3007e+06	3.25071e+06	8.82632e+06	4.27097e+06	6.36163e+07	4.69105e+06	1.62176e+07	5.58279e+07	6.19037e+06	8.95267e+06	2.5916e+07	2.65987e+07	2.21174e+06	787138	682702	748923	2.96802e+06	1.08771e+06	1.41437e+06	951620
α-Eleostearic acid	2.87733e+08	4.01068e+08	4.98537e+06	4.58458e+06	1.59817e+08	9.59874e+07	1.59029e+08	1.59189e+08	2.98144e+08	1.24316e+08	8.51994e+07	4.92421e+06	1.23842e+08	1.16628e+08	1.25509e+08	9.59702e+07	9.36767e+07	8.35731e+07	1.13094e+08	1.13869e+08	1.04997e+08	1.16395e+08	1.04268e+08	1.31006e+07
β-Gastrodin	1.75302e+06	279187	1.11479e+06	1.14107e+06	6.42762e+06	2.64255e+06	2.22637e+06	2.2024e+06	2.61795e+06	4.83873e+06	8.59284e+06	4.41933e+06	1.12266e+06	1.08219e+07	5.40223e+06	3.65796e+06	268291	496727	273287	479339	6.11837e+06	300513	1.32275e+06	2.35159e+06
β-Muricholic acid	831977	982400	845483	811384	895789	820332	864561	64916.9	1.00573e+07	8.47934e+06	8.60404e+06	9.09732e+06	9.813e+06	8.43583e+06	9.08114e+06	706399	804837	796940	830142	856495	851894	971864	852029	63437.1
β-Pyracin	1.72015e+07	9.00524e+06	3.97322e+06	4.71032e+06	8.73149e+06	1.54993e+06	7.52862e+06	5.54113e+06	963735	1.44565e+06	305324	5.21698e+06	718164	690097	1.55666e+06	1.83203e+06	301079	327407	414341	355649	1.57442e+06	353433	554388	501127
γ-Linolenic acid	3.01764e+07	4.87585e+07	7.00805e+07	9.41029e+07	2.23035e+07	7.73298e+06	4.55258e+07	3.21754e+07	8.39786e+06	1.32037e+07	7.21159e+06	5.3272e+07	9.884e+06	1.30927e+07	1.75103e+07	1.76874e+07	5.32516e+06	5.55181e+06	6.56563e+06	1.14022e+06	7.05647e+06	5.84373e+06	5.24717e+06	2.11347e+06
